# Supplementary material
Source: Springer Nature journal article supplement (https://www.springermedizin.de/resource/supplementary/12913_2009_936_MOESM4_ESM.pdf/9536502)
Supplement: MOESM4 [file 9536502]

---

## Questions for each diagnostic stage (e.g. history taking):

---

Were all relevant elements of the patient history addressed?      Yes/ No

Were all relevant deviations in the patients' history detected?      Yes/ No

Were all relevant deviations interpreted correctly?      Yes/ No

Was the correct action executed?      Yes/ No

---
